# Supplementary material for: Modelling the Evolutionary Dynamics of Viruses within Their Hosts: A Case Study Using High-Throughput Sequencing
Source: PubMed Central journal article supplement (PMC3330117; doi:10.1371/journal.ppat.1002654), 2012-04-19
Supplement: ppat.1002654.s002.pdf [file ppat.1002654.s002.pdf]

**Table S1.** Number of well assigned and cleaned sequences to each sample (eight plants by date and the mixed inoculum) and number and frequency of each viral variant (NN, DN, NH and DH) in each population.

| Sample | dpi      | Assigned sequences | Cleaned sequences | Number of cleaned sequences for each PVY variants |     |     |     | Relative frequencies of each PVY variants |       |       |       |
|--------|----------|--------------------|-------------------|---------------------------------------------------|-----|-----|-----|-------------------------------------------|-------|-------|-------|
|        |          |                    |                   | NN                                                | DN  | NH  | DH  | NN                                        | DN    | NH    | DH    |
| 1      | 6 dpi    | 209                | 184               | 125                                               | 14  | 42  | 3   | 0.679                                     | 0.076 | 0.228 | 0.016 |
| 2      | 6 dpi    | 523                | 373               | 335                                               | 17  | 6   | 15  | 0.898                                     | 0.046 | 0.016 | 0.040 |
| 3      | 6 dpi    | 565                | 471               | 241                                               | 16  | 28  | 186 | 0.512                                     | 0.034 | 0.059 | 0.395 |
| 4      | 6 dpi    | 357                | 309               | 147                                               | 23  | 68  | 71  | 0.476                                     | 0.074 | 0.220 | 0.230 |
| 5      | 6 dpi    | 570                | 483               | 347                                               | 10  | 49  | 77  | 0.718                                     | 0.021 | 0.101 | 0.159 |
| 6      | 6 dpi    | 295                | 225               | 157                                               | 25  | 1   | 42  | 0.698                                     | 0.111 | 0.004 | 0.187 |
| 7      | 6 dpi    | 745                | 653               | 307                                               | 21  | 273 | 52  | 0.470                                     | 0.032 | 0.418 | 0.080 |
| 8      | 6 dpi    | 444                | 378               | 87                                                | 103 | 182 | 6   | 0.230                                     | 0.272 | 0.481 | 0.016 |
| 9      | 10 dpi   | 298                | 252               | 81                                                | 0   | 128 | 43  | 0.321                                     | 0.000 | 0.508 | 0.171 |
| 10     | 10 dpi   | 826                | 714               | 3                                                 | 0   | 198 | 513 | 0.004                                     | 0.000 | 0.277 | 0.718 |
| 11     | 10 dpi   | 366                | 317               | 229                                               | 0   | 73  | 15  | 0.722                                     | 0.000 | 0.230 | 0.047 |
| 12     | 10 dpi   | 312                | 245               | 237                                               | 0   | 6   | 2   | 0.967                                     | 0.000 | 0.024 | 0.008 |
| 13     | 10 dpi   | 466                | 419               | 4                                                 | 0   | 415 | 0   | 0.010                                     | 0.000 | 0.990 | 0.000 |
| 14     | 10 dpi   | 930                | 824               | 9                                                 | 0   | 815 | 0   | 0.011                                     | 0.000 | 0.989 | 0.000 |
| 15     | 10 dpi   | 466                | 402               | 400                                               | 0   | 2   | 0   | 0.995                                     | 0.000 | 0.005 | 0.000 |
| 16     | 10 dpi   | 766                | 655               | 432                                               | 0   | 208 | 15  | 0.660                                     | 0.000 | 0.318 | 0.023 |
| 17     | 15 dpi   | 602                | 522               | 333                                               | 0   | 130 | 59  | 0.638                                     | 0.000 | 0.249 | 0.113 |
| 18     | 15 dpi   | 545                | 464               | 212                                               | 2   | 85  | 165 | 0.457                                     | 0.004 | 0.183 | 0.356 |
| 19     | 15 dpi   | 436                | 383               | 143                                               | 0   | 240 | 0   | 0.373                                     | 0.000 | 0.627 | 0.000 |
| 20     | 15 dpi   | 274                | 241               | 32                                                | 6   | 191 | 12  | 0.133                                     | 0.025 | 0.793 | 0.050 |
| 21     | 15 dpi   | 515                | 429               | 417                                               | 7   | 3   | 2   | 0.972                                     | 0.016 | 0.007 | 0.005 |
| 22     | 15 dpi   | 466                | 432               | 16                                                | 0   | 415 | 1   | 0.037                                     | 0.000 | 0.961 | 0.002 |
| 23     | 15 dpi   | 735                | 625               | 483                                               | 0   | 141 | 1   | 0.773                                     | 0.000 | 0.226 | 0.002 |
| 24     | 15 dpi   | 699                | 599               | 390                                               | 2   | 185 | 22  | 0.651                                     | 0.003 | 0.309 | 0.037 |
| 25     | 25 dpi   | 332                | 298               | 149                                               | 0   | 83  | 66  | 0.500                                     | 0.000 | 0.279 | 0.221 |
| 26     | 25 dpi   | 309                | 266               | 184                                               | 0   | 55  | 27  | 0.692                                     | 0.000 | 0.207 | 0.102 |
| 27     | 25 dpi   | 431                | 369               | 265                                               | 1   | 73  | 30  | 0.718                                     | 0.003 | 0.198 | 0.081 |
| 28     | 25 dpi   | 239                | 210               | 122                                               | 0   | 61  | 27  | 0.581                                     | 0.000 | 0.290 | 0.129 |
| 29     | 25 dpi   | 357                | 315               | 178                                               | 1   | 116 | 20  | 0.565                                     | 0.003 | 0.368 | 0.063 |
| 30     | 25 dpi   | 259                | 214               | 105                                               | 0   | 103 | 6   | 0.491                                     | 0.000 | 0.481 | 0.028 |
| 31     | 25 dpi   | 663                | 589               | 227                                               | 0   | 127 | 235 | 0.385                                     | 0.000 | 0.216 | 0.399 |
| 32     | 25 dpi   | 739                | 652               | 269                                               | 0   | 164 | 219 | 0.413                                     | 0.000 | 0.252 | 0.336 |
| 33     | 35 dpi   | 256                | 228               | 103                                               | 3   | 57  | 65  | 0.452                                     | 0.013 | 0.250 | 0.285 |
| 34     | 35 dpi   | 411                | 341               | 214                                               | 0   | 66  | 61  | 0.628                                     | 0.000 | 0.194 | 0.179 |
| 35     | 35 dpi   | 471                | 407               | 233                                               | 0   | 166 | 8   | 0.572                                     | 0.000 | 0.408 | 0.020 |
| 36     | 35 dpi   | 456                | 412               | 144                                               | 0   | 256 | 12  | 0.350                                     | 0.000 | 0.621 | 0.029 |
| 37     | 35 dpi   | 484                | 415               | 290                                               | 0   | 123 | 2   | 0.699                                     | 0.000 | 0.296 | 0.005 |
| 38     | 35 dpi   | 444                | 394               | 314                                               | 0   | 74  | 6   | 0.797                                     | 0.000 | 0.188 | 0.015 |
| 39     | 35 dpi   | 391                | 332               | 127                                               | 2   | 184 | 19  | 0.383                                     | 0.006 | 0.554 | 0.057 |
| 40     | 35 dpi   | 434                | 381               | 245                                               | 1   | 120 | 15  | 0.643                                     | 0.003 | 0.315 | 0.039 |
| 41     | 50 dpi   | 410                | 354               | 351                                               | 0   | 1   | 2   | 0.992                                     | 0.000 | 0.003 | 0.006 |
| 42     | 50 dpi   | 305                | 257               | 255                                               | 0   | 2   | 0   | 0.992                                     | 0.000 | 0.008 | 0.000 |
| 43     | 50 dpi   | 497                | 436               | 404                                               | 0   | 31  | 1   | 0.927                                     | 0.000 | 0.071 | 0.002 |
| 44     | 50 dpi   | 789                | 676               | 628                                               | 0   | 42  | 6   | 0.929                                     | 0.000 | 0.062 | 0.009 |
| 45     | 50 dpi   | 630                | 517               | 509                                               | 0   | 8   | 0   | 0.985                                     | 0.000 | 0.015 | 0.000 |
| 46     | 50 dpi   | 657                | 563               | 533                                               | 0   | 29  | 1   | 0.947                                     | 0.000 | 0.052 | 0.002 |
| 47     | 50 dpi   | 625                | 576               | 31                                                | 1   | 543 | 1   | 0.054                                     | 0.002 | 0.943 | 0.002 |
| 48     | 50 dpi   | 732                | 619               | 527                                               | 4   | 77  | 11  | 0.851                                     | 0.006 | 0.124 | 0.018 |
| 49     | Inoculum | 435                | 375               | 120                                               | 84  | 83  | 88  | 0.320                                     | 0.224 | 0.221 | 0.235 |
