# Supplementary material for: Modelling the Evolutionary Dynamics of Viruses within Their Hosts: A Case Study Using High-Throughput Sequencing
Source: PubMed Central journal article supplement (PMC3330117; doi:10.1371/journal.ppat.1002654), 2012-04-19
Supplement: ppat.1002654.s003.pdf [file ppat.1002654.s003.pdf]

**Table S2.** Estimation of  $N_e$  during plant colonization

|          | Initial populations (15 dpi)     | Final populations (50 dpi) |
|----------|----------------------------------|----------------------------|
| $H_t^a$  | 0.565                            | 0.278                      |
| $H_s^b$  | 0.366                            | 0.100                      |
| $F_{ST}$ | 0.352                            | 0.640                      |
| $N_e$    | 2.249 (1.31 – 3.39) <sup>c</sup> |                            |

<sup>a</sup> genotypic diversity assuming that all plants belong to a single population.

<sup>b</sup> average genotypic diversity within each plant.

<sup>c</sup> The 95% confidence interval was estimated by bootstrapping over plants.
