# Supplementary material for: Modelling the Evolutionary Dynamics of Viruses within Their Hosts: A Case Study Using High-Throughput Sequencing
Source: PubMed Central journal article supplement (PMC3330117; doi:10.1371/journal.ppat.1002654), 2012-04-19
Supplement: ppat.1002654.s004.pdf [file ppat.1002654.s004.pdf]

## Text S1. Note on model identifiability and on likelihood-based inference.

Conditionally to initial inoculation frequencies, the random vectors  $N^p(t_p)$ ,  $p = 1, \dots, 40$  (8 plants x 5 sampling dates) of virus sequences obtained by HTS for each plant  $p$  at its specific time sampling  $t_p$  were independent and followed Dirichlet multinomial (DM) distributions. To write down the likelihood of our experiment, we first recall that the probability mass function

of a  $DM(\lambda, N_{tot}, \theta)$  distribution has the form

$$\Pr(N^p = y | \lambda, N_{tot}, \theta) = p(y | \lambda, N_{tot}, \theta) = \frac{N_{tot}! \Gamma(\theta)}{\Gamma(N_{tot} + \theta)} \prod_{i=1}^4 \frac{\Gamma(y_i + \theta \lambda_i)}{y_i! \Gamma(\theta \lambda_i)}$$

where  $y = (y_1, \dots, y_4)$ ,  $\lambda = (\lambda_1, \dots, \lambda_4)$ , and  $N_{tot} = \sum_{i=1}^4 y_i$ .

Next, let us describe the set of parameters underlying our statistical model. Since we had five sampling dates, i.e.  $t_p \in \{6, 10, 15, 24, 35\} = \{\tau_s ; s = 1, \dots, 5\}$ , the set of parameters amounted to

$\theta^s = \theta(\tau_s)$ , and  $\lambda^s = \lambda(\tau_s) = (\lambda_1^s, \dots, \lambda_4^s)$ ,  $s = 1, \dots, 5$ . Therefore, as  $\sum_{i=1}^4 \lambda_i^s = 1$ ,  $s = 1, \dots, 5$ , the

full statistical model included 20 (=5+3x5) parameters. Actually, the 15 free parameters  $\lambda_i^s$  depended themselves on the 22 (=4+12+1+1+4) unknown parameters  $r_i$ ,  $\beta_{i,j}$ ,  $1 \leq i \neq j \leq 4$ ,  $K$ ,  $\mu$  (recall that  $\mu_{i,j} = f_{i,j}(\mu)$ ) and initial conditions  $V_i(0)$  of ODE System 1.

Consequently, statistical identification of our statistical model would require at least 7 (=22-15) supplementary constraints on the set of parameters of ODE System 1.

Since we dealt only with virus variant frequencies, the time scale (i.e. derivatives could be defined up to a constant), the carrying capacity  $K$  and the number (or size) of virus variants were immaterial at the level of our observations and therefore could be “normalized”.  $K$  was arbitrarily set to  $10^6$  and  $\sum_{i=1}^4 r_i = 4$ . The mutation rate  $\mu$  was set to  $10^{-5}$  and, for the initial

values  $V(0) = V_{tot}^{inoc} \times (\lambda_1(0), \dots, \lambda_4(0))$  of ODE System 1,  $V_{tot}^{inoc}$  was set 100 whereas  $(\lambda_1(0), \dots, \lambda_4(0)) = (0.32, 0.22, 0.22, 0.24)$  corresponded to the observed frequencies of virus variants in the inoculum.

Consequently, the remaining set of 20 parameters was now formally identifiable via the following log-likelihood function (withdrawing the indices of  $\theta^s$ ,  $r_i$ , and  $\beta_{i,j}$ )

$$l(N^p(t_p), p=1, \dots, 40 | \theta, r, \beta) = \sum_{p=1}^{40} \ln(p(N^p(t_p) | \lambda(t_p | r, \beta), N_{tot}^p(t_p), \theta(t_p)))$$

Additionally, we investigated the sensitivity of the model best supported by the data (Table 1:  $\mathfrak{M}_{D_1 \times C_2}$ ). We first analysed the model sensitivity to  $\mu$  and  $V_{tot}^{inoc}$ . Sixteen cases, combining four values ( $10^{-6}$ ,  $10^{-5}$ ,  $10^{-4}$ ,  $10^{-3}$ ) of  $\mu$  with four values (10, 100, 1000,  $10^4$ ) of  $V_{tot}^{inoc}$  were analysed by iterating the same statistical procedure. The percentage of variations of the parameter estimates were all  $< 5\%$ . We next investigated the model sensitivity to a 20% random fluctuation of the initial frequencies of the variants in the inoculum  $(\lambda_1(0), \dots, \lambda_4(0)) = (0.32, 0.22, 0.22, 0.24)$ . The percentage of variations of the parameter estimates were also  $< 5\%$  except for  $\theta^l$  which reached 15%.
